# Supplementary material
Source: publisher figshare collection journal article supplement (https://gsapubs.figshare.com/ndownloader/files/22758335)
Supplement: Supplementary file 1 [file 22758335]

# ONLINE GSA DATA REPOSITORY ITEM

## **<sup>40</sup>Ar/<sup>39</sup>Ar TECHNIQUES**

The <sup>40</sup>Ar/<sup>39</sup>Ar age determinations were performed on crystalline groundmass separates (210-300 μm) and plagioclase and K-feldspar mineral separates using a continuous, 10W CO<sub>2</sub> laserprobe combined with a MAP-215/50 mass spectrometer. Sample preparation and acid leaching procedures are described in Koppers et al. (2000). Irradiated samples were loaded into Cu-planchettes designed with a variety of pans that hold up to 50 mg of material, which are then pumped within a sample chamber fitted with a ZnSe window that is transparent to the CO<sub>2</sub> laser wavelength. Software allows for scanning across samples in a preset pattern with a defocused beam, to evenly heat the geological material. Gas cleanup was accomplished with a series of Zr-Al getters. All ages were calculated relative to the flux monitor standard FCT-3 biotite (28.04 ± 0.18 Ma, 1σ, Renne et al., 1994) and calculated using the corrected Steiger and Jäger (1977) decay constant of  $5.530 \pm 0.097 \times 10^{-10}$  1/yr (2σ) as reported by Min et al. (2000). For a detailed description of the analytical facility and the constants used in the age calculations we refer to Koppers et al. (2003). Incremental heating plateau ages and isochron ages were calculated using the ArArCALC v2.4 software from Koppers (2002) that is available from the <http://earthref.org/tools/ararcalc.htm> website. In this paper, all errors on the <sup>40</sup>Ar/<sup>39</sup>Ar ages are reported at the 95% confidence level (2σ), unless otherwise indicated.

## **<sup>40</sup>Ar/<sup>39</sup>Ar QUALITY CRITERIA**

In this study we adopted the following quality criteria: (1) age plateaus should include more than three incremental heating steps and at least 50% of the total amount of <sup>39</sup>Ar released, (2) the plateau, isochron and total fusion ages should be concordant at the 95% confidence level, (3) the <sup>40</sup>Ar/<sup>36</sup>Ar intercepts on the isochron diagrams should be concordant with the atmospheric value of

295.5 at the 95% confidence level, and (4) the mean square of weighted deviations for both the plateau ages ( $\text{MSWD} = \text{SUMS}/N-1$ ) and isochron ages ( $\text{MSWD} = \text{SUMS}/N-2$ ) should be sufficiently small when compared to student's t-test and F-statistic critical values for significance.

#### **$^{40}\text{Ar}/^{39}\text{Ar}$ DATA**

In Table DR1 a summary of the results of our seven new  $^{40}\text{Ar}/^{39}\text{Ar}$  analyses have been listed. The age plateau diagrams are all depicted in Figure DR1, whereas the dredge locations are displayed on top of a 3D rendition of Savai'i Island in Figure DR2.

#### **SAMPLE DESCRIPTIONS AND GEOCHEMISTRY**

In Table DR2 we provide summary of the sample descriptions (Russell, 2007). In Table DR3 we list the major and trace element geochemistry and isotope ratios of the six dredge samples (Jackson et al., 2007) that also were dated using the  $^{40}\text{Ar}/^{39}\text{Ar}$  technique in this study. For a detailed description of the analytical techniques used we refer to the Supplementary Table 3 in Jackson et al. (2007).

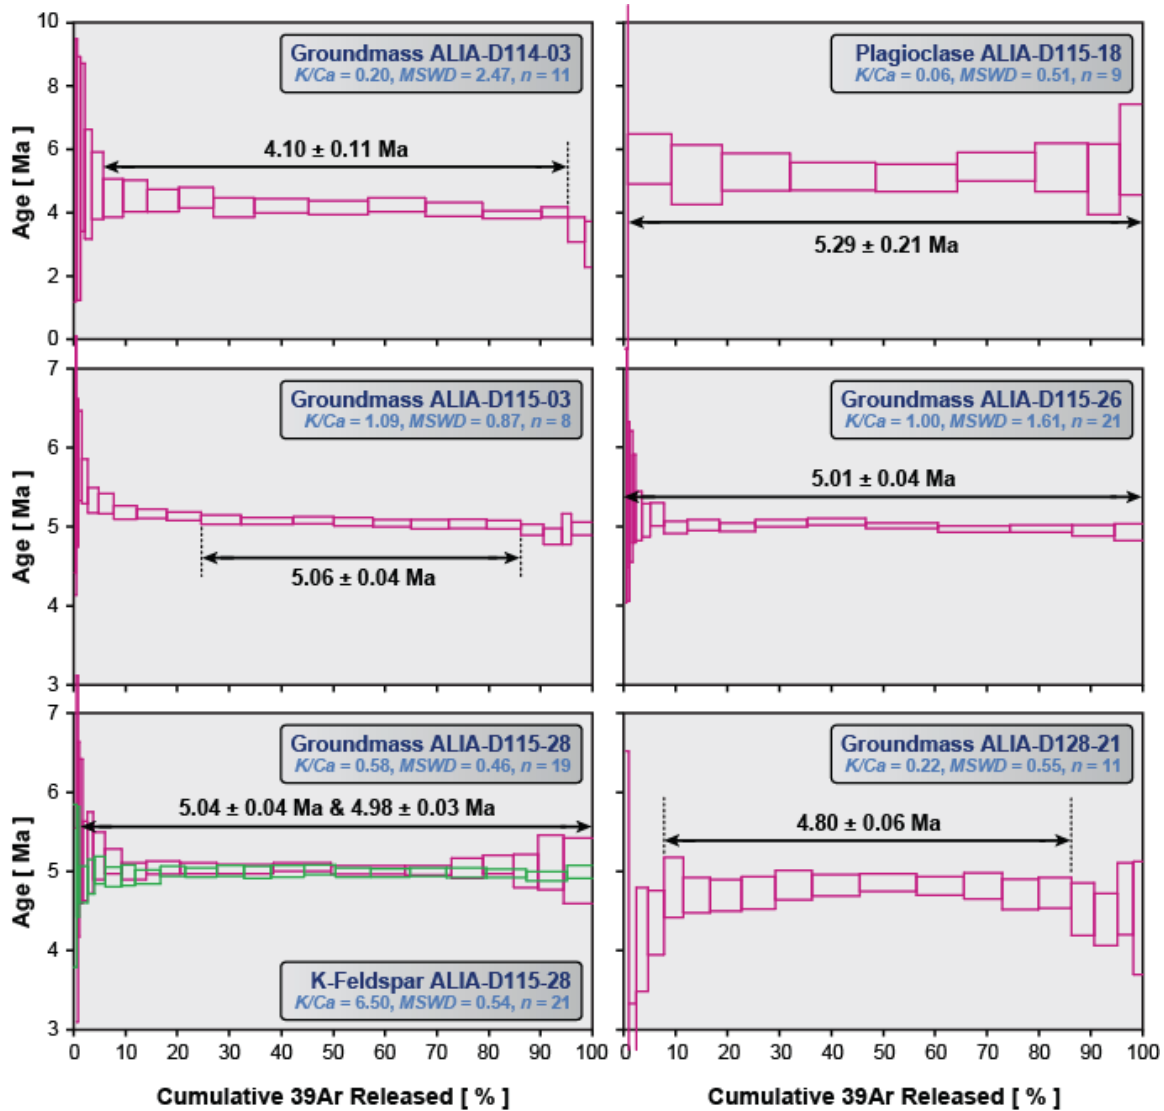

**Figure DR1.** New  $^{40}\text{Ar}/^{39}\text{Ar}$  age spectra for the submarine Savai'i basalts. The reported ages are weighted age estimates with errors reported at the 95% confidence level, including 0.3-0.4% standard deviations in the J-value. Note that the groundmass age spectrum for sample ALIA-D115-28 was reproduced within the 95% confidence limit in a second incremental heating experiment with a K-feldspar mineral separate (green lines).

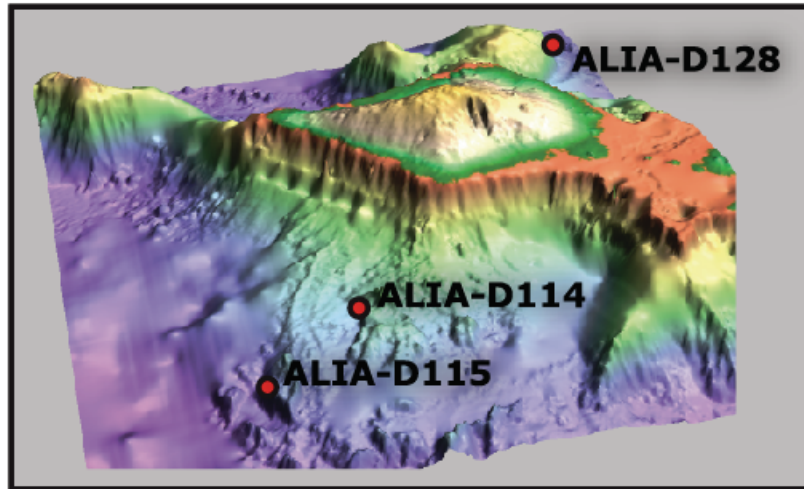

**Figure DR2.** 3D rendition of Savai'i Island looking from the SW with dredge locations. Visit the *Seamount Catalog* to find detailed bathymetric maps, grid files and multibeam data by using the <http://earthref.org/cgi-bin/sc.cgi?id=SMNT-137S-1725W> web link.

| Sample Number | Lab Number | Lat       | Lon        | Depth (mbsf) | Sample Type | Age Spectrum           |                      |      |      | Total Fusion |                        | Inverse Isochron Analyses |                                           |      |
|---------------|------------|-----------|------------|--------------|-------------|------------------------|----------------------|------|------|--------------|------------------------|---------------------------|-------------------------------------------|------|
|               |            |           |            |              |             | Age $\pm 2\sigma$ (Ma) | $^{39}\text{Ar}$ (%) | K/Ca | MSWD | n            | Age $\pm 2\sigma$ (Ma) | Age $\pm 2\sigma$ (Ma)    | $^{40}\text{Ar}/^{36}\text{Ar}$ intercept | MSWD |
| ALIA-D114-03  | 06C3569    | 13°58.7'S | 172°44.4'W | 3,100-2,600  | Groundmass  | 4.10 $\pm$ 0.11        | 89.9                 | 0.20 | 2.47 | 11           | 4.22 $\pm$ 0.09        | 5.11 $\pm$ 0.06           | 229.7 $\pm$ 64.9                          | 0.57 |
| ALIA-D115-03  | 06C3034    | 14°05.5'S | 172°56.5'W | 4,100-3,200  | Groundmass  | 5.06 $\pm$ 0.04        | 61.7                 | 1.09 | 0.87 | 8            | 5.10 $\pm$ 0.04        |                           |                                           |      |
| ALIA-D115-18  | 06C3069    |           |            |              | Plagioclase | 5.29 $\pm$ 0.21        | 99.5                 | 0.06 | 0.51 | 9            | 5.35 $\pm$ 0.23        |                           |                                           |      |
| ALIA-D115-26  | 06C3540    |           |            |              | Groundmass  | 5.01 $\pm$ 0.04        | 100.0                | 1.00 | 1.61 | 21           | 5.02 $\pm$ 0.04        | 5.02 $\pm$ 0.04           | 290.1 $\pm$ 8.3                           | 1.56 |
| ALIA-D115-28  | 06C2898    |           |            |              | Groundmass  | 5.04 $\pm$ 0.04        | 99.6                 | 0.58 | 0.46 | 19           | 5.07 $\pm$ 0.05        | 5.03 $\pm$ 0.04           | 296.2 $\pm$ 2.7                           | 0.47 |
|               | 06C3509    |           |            |              | K-Feldspar  | 4.98 $\pm$ 0.03        | 100.0                | 6.50 | 0.54 | 21           | 4.97 $\pm$ 0.03        | 4.99 $\pm$ 0.05           | 279.1 $\pm$ 66.0                          | 0.55 |
| ALIA-D128-21  | 06C3007    | 13°12.7'S | 172°05.8'W | 2,600-2,500  | Groundmass  | 4.80 $\pm$ 0.06        | 78.6                 | 0.22 | 0.55 | 11           | 4.70 $\pm$ 0.07        | 4.84 $\pm$ 0.10           | 282.0 $\pm$ 23.6                          | 0.48 |

**Table DR1.** Summary of  $^{40}\text{Ar}/^{39}\text{Ar}$  age data on dredge samples from the submarine flanks of Savai'i Island. All samples were monitored against FCT-3 biotite ( $28.04 \pm 0.18$  Ma) as calibrated by Renne et al. 1998 (1998). Reported errors on the  $^{40}\text{Ar}/^{39}\text{Ar}$  ages are at the 95% confidence level including 0.3-0.4% standard deviation on the J-value. All input parameters to the calculations are published in Table 2 of Koppers et al. 2003 (2003), whereas the ArArCALC v2.4 age calculations are described in Koppers 2002 (Koppers, 2002). Detailed data sets are available in the Supplementary Materials and all ArArCALC age calculation files can be downloaded separately from the *EarthRef.org Digital Archive* (ERDA).

| ALIA 2005<br>Dredge | Thin Section Photograph                                                             |                                                                                     | Description                                                                                                                                                                                                      | Material(s)<br>Age Dated                                                                                        |
|---------------------|-------------------------------------------------------------------------------------|-------------------------------------------------------------------------------------|------------------------------------------------------------------------------------------------------------------------------------------------------------------------------------------------------------------|-----------------------------------------------------------------------------------------------------------------|
|                     | Plain Polarized Light                                                               | Cross Polarized Light                                                               |                                                                                                                                                                                                                  |                                                                                                                 |
| D114-03             | 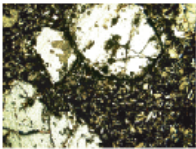   |    | Non-vesicular picritic basalt;<br><b>phenox</b> = 20% cpx, 5% olivine;<br><b>grndm</b> = hypocrySTALLINE with 40% plg; <b>alt</b> = all of olivine, 5% in groundmass, 2% in cpx;<br><b>other</b> = thin Mn crust | Groundmass<br>Leached (2X), magnet<br>handpicked 109.6 mg                                                       |
| D115-03             |    |    | Vesicular (1%) hawaiite;<br><b>phenox</b> = 25% cpx, 10% plg;<br><b>grndm</b> = hypocrySTALLINE with 60% plg, 10% cpx; <b>alt</b> = 10% in groundmass                                                            | Groundmass<br>Leached<br>handpicked 112.3 mg                                                                    |
| D115-18             |    |    | Vesicular (20%) trachybasalt;<br><b>phenox</b> = 5% plg, 3% cpx;<br><b>grndm</b> = holocrySTALLINE with 20% plg; <b>alt</b> = 10% in groundmass; <b>other</b> = thin Mn crust                                    | K-Feldspar<br>Magnet, leached<br>handpicked 30.9 mg                                                             |
| D115-26             |   |   | Vesicular (5%) trachybasalt;<br><b>phenox</b> = 5% plg, 3% cpx, <1% olivine; <b>grndm</b> = holocrySTALLINE with 95% plg and 5% cpx; <b>alt</b> = 3% in phenocrysts, 1% in groundmass                            | Groundmass<br>Magnet, leached<br>handpicked 103.9 mg                                                            |
| D115-28             |  |  | Vesicular (5%) hawaiite;<br><b>phenox</b> = 5% cpx; <b>grndm</b> = holocrySTALLINE with 90% plg and kfs; <b>alt</b> = 5% in groundmass                                                                           | Groundmass<br>Magnet, leached<br>handpicked 111.1 mg<br><br>K-Feldspar<br>Magnet, leached<br>handpicked 64.3 mg |
| D128-21             |  |  | Vesicular (40%) alkali basalt;<br><b>phenox</b> = 25% cpx; <b>grndm</b> = hypocrySTALLINE with 20% cpx, 10% plg; <b>alt</b> = 20% in groundmass                                                                  | Groundmass<br>Magnet, leached<br>handpicked 103.9 mg                                                            |

**Table DR2.** Sample descriptions and thin section pictures of Savai'i dredge samples. After Russell (2007).

| Sample Number<br>Rock Type         | ALIA-D114-03<br>Picritic Basalt | ALIA-D115-03<br>Hawaiite | ALIA-D115-18<br>Trachybasalt | ALIA-D115-26<br>Trachybasalt | ALIA-D115-28<br>Hawaiite         | ALIA-D128-21<br>Alkali Basalt |
|------------------------------------|---------------------------------|--------------------------|------------------------------|------------------------------|----------------------------------|-------------------------------|
| <b>Latitude</b>                    | 13°58.7'S                       | 14°05.5'S                | 14°05.5'S                    | 14°05.5'S                    | 14°05.5'S                        | 13°12.7'S                     |
| <b>Longitude</b>                   | 172°44.4'W                      | 172°56.5'W               | 172°56.5'W                   | 172°56.5'W                   | 172°56.5'W                       | 172°05.8'W                    |
| <b>Depth Range (m)</b>             | 3,100-2,600                     | 4,100-3,200              | 4,100-3,200                  | 4,100-3,200                  | 4,100-3,200                      | 2,600-2,500                   |
| <b>40Ar/39Ar Age</b>               | 4.10 ± 0.11 Ma                  | 5.06 ± 0.04 Ma           | 5.29 ± 0.21 Ma               | 5.01 ± 0.04 Ma               | 5.04 ± 0.04 Ma<br>4.98 ± 0.03 Ma | 4.80 ± 0.06 Ma                |
| <b>SiO<sub>2</sub></b>             | 44.92                           | 49.16                    | 52.28                        | 51.88                        | 50.00                            | 48.95                         |
| <b>Al<sub>2</sub>O<sub>3</sub></b> | 7.42                            | 12.59                    | 14.20                        | 14.26                        | 13.44                            | 12.11                         |
| <b>TiO<sub>2</sub></b>             | 3.00                            | 3.50                     | 2.45                         | 2.71                         | 3.30                             | 2.28                          |
| <b>FeO</b>                         | 12.33                           | 9.74                     | 7.09                         | 7.46                         | 7.86                             | 9.67                          |
| <b>MnO</b>                         | 0.18                            | 0.13                     | 0.07                         | 0.09                         | 0.12                             | 0.17                          |
| <b>CaO</b>                         | 8.89                            | 8.17                     | 6.08                         | 7.27                         | 9.62                             | 9.81                          |
| <b>MgO</b>                         | 20.07                           | 7.97                     | 5.09                         | 4.08                         | 6.37                             | 11.65                         |
| <b>K<sub>2</sub>O</b>              | 0.83                            | 3.09                     | 4.01                         | 3.52                         | 2.73                             | 1.23                          |
| <b>Na<sub>2</sub>O</b>             | 1.55                            | 2.85                     | 3.64                         | 3.50                         | 3.15                             | 2.12                          |
| <b>P<sub>2</sub>O<sub>5</sub></b>  | 0.36                            | 0.51                     | 0.36                         | 0.42                         | 0.52                             | 0.25                          |
| <b>Total</b>                       | 99.55                           | 97.71                    | 95.27                        | 95.19                        | 97.11                            | 98.24                         |
| <b>Mg#</b>                         | 76.32                           | 61.84                    | 58.73                        | 52.02                        | 61.63                            | 70.46                         |
| <b>LOI</b>                         | 0.00                            | 1.90                     | 4.40                         | 4.42                         | 2.51                             | 1.43                          |
| <b>Ni (ppm)</b>                    | 820                             | 222                      | 116                          | 106                          | 180                              | 265                           |
| <b>Cr</b>                          | 1418                            | 370                      | 244                          | 494                          | 464                              | 713                           |
| <b>V</b>                           | 258                             | 237                      | 154                          | 221                          | 270                              | 261                           |
| <b>Ga</b>                          | 13                              | 24                       | 27                           | 27                           | 24                               | 19                            |
| <b>Cu</b>                          | 76                              | 41                       | 23                           | 53                           | 52                               | 41                            |
| <b>Zn</b>                          | 127                             | 120                      | 111                          | 150                          | 103                              | 115                           |
| <b>Cs</b>                          | 0.22                            | 0.7                      | 0.59                         | 0.58                         | 0.66                             | 0.41                          |
| <b>Rb</b>                          | 14.2                            | 83.1                     | 97.4                         | 99.8                         | 81.4                             | 28.4                          |
| <b>Ba</b>                          | 177                             | 569                      | 646                          | 586                          | 510                              | 240                           |
| <b>Th</b>                          | 3.28                            | 7.13                     | 10.74                        | 10.31                        | 8.89                             | 4.29                          |
| <b>U</b>                           | 0.63                            | 1.63                     | 1.84                         | 2.1                          | 1.77                             | 0.72                          |
| <b>Nb</b>                          | 33.64                           | 54.12                    | 47.48                        | 47.73                        | 54.31                            | 31.26                         |
| <b>Ta</b>                          | 2.31                            | 3.68                     | 3.17                         | 3.23                         | 3.61                             | 2.17                          |
| <b>La</b>                          | 28.05                           | 53.17                    | 66.92                        | 59.58                        | 61.04                            | 32.25                         |
| <b>Ce</b>                          | 60.69                           | 104.2                    | 130.1                        | 118.6                        | 119.4                            | 66.79                         |
| <b>Pb</b>                          | 2.28                            | 7.27                     | 11.29                        | 8.84                         | 11.61                            | 4.77                          |
| <b>Pr</b>                          | 7.75                            | 11.97                    | 15.02                        | 14.39                        | 13.76                            | 8.55                          |
| <b>Nd</b>                          | 32.01                           | 48.31                    | 55.89                        | 55.43                        | 52.43                            | 34.67                         |
| <b>Sr</b>                          | 374                             | 617                      | 511                          | 5.28                         | 645                              | 363                           |
| <b>Zr</b>                          | 186                             | 305                      | 341                          | 320                          | 313                              | 179                           |
| <b>Hf</b>                          | 4.8                             | 8.02                     | 8.86                         | 8.26                         | 7.88                             | 5.02                          |
| <b>Sm</b>                          | 7.06                            | 10.69                    | 10.66                        | 11.24                        | 10.46                            | 7.5                           |
| <b>Eu</b>                          | 2.22                            | 3.14                     | 3                            | 3.2                          | 3.14                             | 2.17                          |
| <b>Gd</b>                          | 6.2                             | 9.02                     | 8.34                         | 9.2                          | 9.01                             | 6.86                          |
| <b>Tb</b>                          | 0.9                             | 1.25                     | 1.13                         | 1.28                         | 1.24                             | 1.02                          |
| <b>Dy</b>                          | 4.89                            | 6.44                     | 5.67                         | 6.66                         | 6.65                             | 5.49                          |
| <b>Ho</b>                          | 0.86                            | 1.06                     | 0.97                         | 1.15                         | 1.15                             | 1.03                          |
| <b>Y</b>                           | 20.58                           | 27.26                    | 24.05                        | 28.79                        | 28.16                            | 25.78                         |
| <b>Er</b>                          | 2                               | 2.36                     | 2.2                          | 2.65                         | 2.69                             | 2.47                          |
| <b>Tm</b>                          | 0.25                            | 0.3                      | 0.28                         | 0.33                         | 0.33                             | 0.34                          |
| <b>Yb</b>                          | 1.41                            | 1.59                     | 1.47                         | 1.87                         | 1.89                             | 1.98                          |
| <b>Lu</b>                          | 0.2                             | 0.22                     | 0.21                         | 0.27                         | 0.27                             | 0.29                          |
| <b>Sc</b>                          | 29.9                            | 19.8                     | 15.2                         | 19.8                         | 24.4                             | 28.9                          |
| <b>87Sr/86Sr</b>                   | 0.705435                        | 0.711409                 | 0.718592                     | 0.716394                     | 0.709985                         | 0.712500                      |
| <b>143Nd/144Nd</b>                 | 0.512763                        | 0.512593                 | 0.512314                     | 0.512389                     | 0.512570                         | 0.512459                      |
| <b>206Pb/204Pb</b>                 | 19.322                          | 19.011                   | 18.957                       | 19.009                       | 19.034                           | 18.963                        |
| <b>207Pb/204Pb</b>                 | 15.619                          | 15.633                   | 15.643                       | 15.644                       | 15.634                           | 15.628                        |
| <b>208Pb/204Pb</b>                 | 39.475                          | 39.347                   | 39.399                       | 39.452                       | 39.419                           | 39.273                        |

**Table DR3.** Major and trace element data and isotope ratios on Savai'i dredge samples. After Jackson et al. (2007).

## References

- Jackson, M.G., Hart, S.R., Koppers, A.A.P., Staudigel, H., Konter, J., Blusztajn, J., Kurz, M.D., and Russell, J.A., 2007, The return of subducted continental crust in Samoan lavas: *Nature*, v. 448, p. 684-687, doi:10.1038/nature06048.
- Koppers, A.A.P., 2002, ArArCALC - software for Ar-40/Ar-39 age calculations: *Computers & Geosciences*, v. 28, p. 605-619.
- Koppers, A.A.P., Staudigel, H., and Duncan, R.A., 2003, High-resolution Ar-40/Ar-39 dating of the oldest oceanic basement basalts in the western Pacific basin: *Geochemistry Geophysics Geosystems*, v. 4.
- Koppers, A.A.P., Staudigel, H., and Wijbrans, J.R., 2000, Dating crystalline groundmass separates of altered Cretaceous seamount basalts by the Ar-40/Ar-39 incremental heating technique: *Chemical Geology*, v. 166, p. 139-158, doi: 10.1016/S0009-2541(99)00188-6.
- Min, K.W., Mundil, R., Renne, P.R., and Ludwig, K.R., 2000, A test for systematic errors in Ar-40/Ar-39 geochronology through comparison with U/Pb analysis of a 1.1-Ga rhyolite: *Geochimica Et Cosmochimica Acta*, v. 64, p. 73-98.
- Renne, P.R., Deino, A.L., Walter, R.C., Turrin, B.D., Swisher III, C.C., Becker, T.A., Curtis, G.H., Sharp, W.D., and Jaouni, A.-R., 1994, Intercalibration of astronomical and radioisotopic time: *Geology*, v. 22, p. 783-786.
- Renne, P.R., Swisher, C.C., Deino, A.L., Karner, D.B., Owens, T.L., and DePaolo, D.J., 1998, Intercalibration of standards, absolute ages and uncertainties in  $^{40}\text{Ar}/^{39}\text{Ar}$  dating: *Chemical Geology*, v. 145, p. 117-152.
- Russell, J.A., 2007, Linear Age Progressions in Samoan Sub-Parallel Intra-Plate Volcanic Trails, University of California, San Diego, M.Sc. Thesis, 100 p.
- Steiger, R.H., and Jager, E., 1977, Subcommittee on geochronology: convention on the use of decay constants in geo- and cosmochemistry: *Earth and Planetary Science Letters*, v. 36, p. 359-362.
